# Supplementary material for: Weighted Euclidean balancing for a matrix exposure in estimating causal effect
Source: publisher site journal article supplement (doi:10.1515/ijb-2024-0021), 2025-05-01
Supplement: Supplementary file 1 [file j_ijb-2024-0021_suppl_002.pdf]

## Research Article

Juan Chen<sup>1,2</sup> and Yingchun Zhou<sup>1,2\*</sup>

# Supplementary Materials for Weighted Euclidean balancing for a matrix exposure in estimating causal effect

## 1. Proof of Theorem 1

The primal problem is

$$\min_{\mathbf{w}} \sum_{i=1}^n w_i \log(w_i)$$

s.t.

$$\sum_{k=1}^K \{ \lambda_k^2 [ \sum_{i=1}^n w_i (m_{K,k}(\mathbf{T}_i, \mathbf{X}_i) - \bar{m}_{K,k}) ]^2 \} \leq \delta. \quad (1)$$

Let  $\|\theta\|_2 = \sqrt{\theta_1^2 + \dots + \theta_K^2}$  be the  $l_2$  norm for an arbitrary  $K$ -dimensional vector  $\theta = (\theta_1, \dots, \theta_K)'$  and  $\Lambda = \text{diag}(\lambda_1, \dots, \lambda_K)$ , then the inequality constraint in the primal problem can be rewritten as  $\|\sum_{i=1}^n w_i \Lambda(m_K(\mathbf{T}_i, \mathbf{X}_i) - \bar{m}_K)\|_2 \leq \sqrt{\delta}$ . Let  $\mathcal{A} \subseteq R^K$  be a convex set such that  $\mathcal{A} = \{a \in R^K : \|a\|_2 \leq \sqrt{\delta}\}$ . Define  $I_{\mathcal{A}}(a) = 0$  if  $a \in \mathcal{A}$  and  $I_{\mathcal{A}}(a) = \infty$  otherwise. Then, the primal problem (1) is equivalent to the following optimaization problem:

$$\min_{\mathbf{w}} \sum_{i=1}^n w_i \log(w_i) + I_{\mathcal{A}}(\sum_{i=1}^n w_i \Lambda(m_K(\mathbf{T}_i, \mathbf{X}_i) - \bar{m}_K)).$$

**\*Corresponding Author: Yingchun Zhou<sup>1,2</sup>:** <sup>1</sup>KLATASDS-MOE, School of Statistics, East China Normal University, 3663 North Zhongshan Road, Shanghai, 200062, P.R. China ,

<sup>2</sup>Institute of Brain and Education Innovation, East China Normal University, Shanghai, P.R. China; E-mail: yczhou@stat.ecnu.edu.cn

Let  $h(w) = \sum_{i=1}^n w_i \log(w_i)$ , the conjugate function of  $h$  is

$$\begin{aligned} h^*(w) &= \sup_t \left( \sum_{i=1}^n w_i t_i - \sum_{i=1}^n t_i \log(t_i) \right) \\ &= \sup_t \sum_{i=1}^n (w_i t_i - t_i \log(t_i)) \\ &= \sum_{i=1}^n \sup_{t_i} (w_i t_i - t_i \log(t_i)) \\ &= \sum_{i=1}^n f^*(w_i), \end{aligned}$$

where  $f^*(w_i) = \sup_{t_i} (w_i t_i - t_i \log(t_i))$  is the conjugate function of  $f(w_i) = w_i \log(w_i)$ . Let  $g(\theta) = I_{\mathcal{A}}(\theta)$  for any  $\theta \in R^K$ , then the conjugate function of  $g$  is

$$\begin{aligned} g^*(\theta) &= \sup_a \left( \sum_{k=1}^K \theta_k a_k - T_{\mathcal{A}}(a) \right) \\ &= \sup_{\|a\|_2 \leq \sqrt{\delta}} \left( \sum_{k=1}^K \theta_k a_k \right) \\ &= \sup_{\|a\|_2 \leq \sqrt{\delta}} (\|\theta\|_2 \|a\|_2) \\ &= \sqrt{\delta} \|\theta\|_2. \end{aligned}$$

Define the mapping  $H : R^n \rightarrow R^K$  such that  $Hw = \sum_{i=1}^n w_i \Lambda(m_K(\mathbf{T}_i, \mathbf{X}_i) - \bar{m}_K)$ , then  $H$  is a bounded linear map. Let  $H^*$  be the adjoint operator of  $H$ , then for all  $\theta = (\theta_1, \dots, \theta_K)' \in R^K$ ,

$$H^* \theta = \left( \sum_{k=1}^K \theta_k \lambda_k(m_{K,k}(\mathbf{T}_1, \mathbf{X}_1) - \bar{m}_{K,k}), \dots, \sum_{k=1}^K \theta_k \lambda_k(m_{K,k}(\mathbf{T}_n, \mathbf{X}_n) - \bar{m}_{K,k}) \right)'.$$

Define  $\tilde{\theta} = H\tilde{w} = \frac{1}{n^r} \sum_{i=1}^n \Lambda(m_K(\mathbf{T}_i, \mathbf{X}_i) - \bar{m}_K)$ , where  $\tilde{w} = (\frac{1}{n^r}, \dots, \frac{1}{n^r})' \in \text{dom}(F)$ . Here, we choose  $b$  to be sufficiently large such that  $\|\tilde{\theta}\|_2 \leq \sqrt{\delta}$ , then we obtain that  $g(\tilde{\theta}) = 0$  and  $g$  is continuous at  $\tilde{\theta}$ . Therefore,  $\tilde{\theta} \in H(\text{dom}(F) \cap \text{cont}(g))$ , which implies that  $H(\text{dom}(F) \cap \text{cont}(g)) \neq \emptyset$ . Here,  $\text{dom}(F)$  and  $\text{cont}(g)$  denotes the domain of  $F$  and the continuous set of  $g$ , respectively. Therefore, the strong duality condition of the Fenchel duality theorem is verified. Moreover,

$$F(H^* \theta) + g^*(-\theta) = \sum_{i=1}^n f^* \left( \sum_{k=1}^K \theta_k \lambda_k(m_{K,k}(\mathbf{T}_i, \mathbf{X}_i) - \bar{m}_{K,k}) \right) + \sqrt{\delta} \|\theta\|_2.$$

According to the Fenchel duality theorem [1, Theorem B.39], we have

$$\begin{aligned} & \min_w \sum_{i=1}^n w_i \log(w_i) + I_{\mathcal{A}}\left(\sum_{i=1}^n w_i \Lambda(m_K(\mathbf{T}_i, \mathbf{X}_i) - \bar{m}_K)\right) \\ &= \min_{\theta} \sum_{i=1}^n f^*\left(\sum_{k=1}^K \theta_k \lambda_k(m_{K,k}(\mathbf{T}_i, \mathbf{X}_i) - \bar{m}_{K,k})\right) + \sqrt{\delta} \|\theta\|_2 \end{aligned}$$

Furthermore, since the strong duality condition holds, we can conclude that  $H^* \hat{\theta}$  is a subgradient of  $F$  at  $\hat{w}$ . That is,

$$\sum_{k=1}^K \hat{\theta}_k \lambda_k(m_{K,k}(\mathbf{T}_i, \mathbf{X}_i) - \bar{m}_{K,k}) = \log(\hat{w}_i) + 1.$$

Therefore,  $\hat{w}_i = \exp(\sum_{k=1}^K \hat{\theta}_k \lambda_k(m_{K,k}(\mathbf{T}_i, \mathbf{X}_i) - \bar{m}_{K,k}) - 1)$ . The proof of theorem 1 is completed.

## 2. Proof of Proposition 1

Using the law of total expectation and Assumption 1-3, we can deduce that

$$\begin{aligned} & \mathbb{E}[w(Y - \langle \mathbf{B}, \mathbf{T} \rangle)^2] \\ &= E\left[\frac{f(\mathbf{T})}{f(\mathbf{T} | \mathbf{X})} (Y - \langle \mathbf{B}, \mathbf{T} \rangle)^2\right] \\ &= \mathbb{E}\left(\mathbb{E}\left[\frac{f(\mathbf{T})}{f(\mathbf{T} | \mathbf{X})} (Y - \langle \mathbf{B}, \mathbf{T} \rangle)^2 \mid \mathbf{T} = \mathbf{t}, \mathbf{X} = \mathbf{x}\right]\right) \quad (\text{the law of total expectation}) \\ &= \mathbb{E}\left(\frac{f(\mathbf{t})}{f(\mathbf{t} | \mathbf{x})} \mathbb{E}[(Y - \langle \mathbf{B}, \mathbf{T} \rangle)^2 \mid \mathbf{T} = \mathbf{t}, \mathbf{X} = \mathbf{x}]\right) \\ &= \int_{\mathcal{T} \times \mathcal{X}} \frac{f(\mathbf{t})}{f(\mathbf{t} | \mathbf{x})} \mathbb{E}[(Y(\mathbf{t}) - \langle \mathbf{B}, \mathbf{t} \rangle)^2 \mid \mathbf{T} = \mathbf{t}, \mathbf{X} = \mathbf{x}] f(\mathbf{t} | \mathbf{x}) d\mathbf{t} d\mathbf{x} \quad (\text{using Assumption 3}) \\ &= \int_{\mathcal{T} \times \mathcal{X}} \mathbb{E}[(Y(\mathbf{t}) - \langle \mathbf{B}, \mathbf{t} \rangle)^2 \mid \mathbf{T} = \mathbf{t}, \mathbf{X} = \mathbf{x}] f(\mathbf{t}) f(\mathbf{x}) d\mathbf{t} d\mathbf{x} \\ &= \int_{\mathcal{T} \times \mathcal{X}} \mathbb{E}[(Y(\mathbf{t}) - \langle \mathbf{B}, \mathbf{t} \rangle)^2 \mid \mathbf{X} = \mathbf{x}] f(\mathbf{t}) f(\mathbf{x}) d\mathbf{t} d\mathbf{x} \quad (\text{using Assumption 1}) \\ &= \int_{\mathcal{T}} \mathbb{E}[(Y(\mathbf{t}) - \langle \mathbf{B}, \mathbf{t} \rangle)^2] f(\mathbf{t}) d\mathbf{t}. \end{aligned}$$

Hence, we complete the proof of Proposition 1.

### 3. Proof of Theorem 2

To prove Theorem 2, we first prove the following lemma.

**Lemma 1.** There exists a global minimizer  $\hat{\theta}$  such that

$$\|\hat{\theta} - \theta^*\|_2 = O_p(K^{1/2}(\log K)/n^{3/2} + K^{1/2-\bar{\alpha}}). \quad (2)$$

*Proof:* Define  $\rho(x) = e^{x-1}$ ,  $A_i = B(T_i, X_i) = (\lambda_1 M_1(T_i, X_i), \dots, \lambda_K M_K(T_i, X_i))$ , then the optimal objective is

$$G(\theta) = \frac{1}{n} \sum_{i=1}^n \rho(A_i^\top \theta) + \sqrt{\delta} \|\theta\|_2, \quad (3)$$

where  $G(\cdot)$  is convex in  $\theta$ . To show that a minimizer  $\Delta^*$  of  $G(\theta^* + \Delta)$  exists in  $\mathcal{C} = \{\Delta \in R^K : \|\Delta\|_2 \leq C(K^{1/2}(\log K)/n^{3/2} + K^{1/2-\bar{\alpha}})\}$  for some constant  $C$ , it suffices to show that

$$E\{inf_{\Delta \in \mathcal{C}} G(\theta^* + \Delta) - G(\theta^*) > 0\} \rightarrow 1, \text{ as } n \rightarrow \infty, \quad (4)$$

by the continuity of  $G(\cdot)$ .

To show (3), we use mean value theorem:

$$\begin{aligned} & G(\theta^* + \Delta) - G(\theta^*) \\ & \geq \frac{1}{n} \Delta^\top \sum_{i=1}^n (\rho'(A_i^\top \theta^*) A_i) + \frac{1}{2n} \Delta^\top \left\{ \sum_{i=1}^n (\rho''(A_i^\top \tilde{\theta}) A_i A_i^\top) \right\} \Delta - \sqrt{\delta} \|\Delta\|_2 \\ & \geq -\|\Delta\|_2 \left\| \frac{1}{n} \sum_{i=1}^n (\rho'(A_i^\top \theta^*) A_i) \right\|_2 + \frac{1}{2n} \Delta^\top \left\{ \sum_{i=1}^n (\rho''(A_i^\top \tilde{\theta}) A_i A_i^\top) \right\} \Delta - \sqrt{\delta} \|\Delta\|_2 \\ & = \frac{1}{2n} \Delta^\top \left\{ \sum_{i=1}^n (\rho''(A_i^\top \tilde{\theta}) A_i A_i^\top) \right\} \Delta - (\sqrt{\delta} + \left\| \frac{1}{n} \sum_{i=1}^n (\rho'(A_i^\top \theta^*) A_i) \right\|_2) \|\Delta\|_2 \end{aligned} \quad (5)$$

where  $\tilde{\theta}$  lies between  $\theta^*$  and  $\hat{\theta}$ . The first inequality is due to the triangle inequality,  $\|\theta^* + \Delta\|_2 - \|\theta^*\|_2 \geq -\|\Delta\|_2$ , the second inequality follows from Cauchy-Schwarz inequality.

Next we note that

$$\begin{aligned}
& \left\| \frac{1}{n} \sum_{i=1}^n (\rho'(A_i^\top \theta) A_i) \right\|_2 \\
& \leq \left\| \frac{1}{n} \sum_{i=1}^n (\rho'(A_i^\top \theta) A_i - w_i A_i) \right\|_2 + \left\| \frac{1}{n} \sum_{i=1}^n w_i A_i \right\|_2 \\
& \leq \frac{1}{n} \sum_{i=1}^n \|A_i\|_2 O(K^{-\tilde{\alpha}}) + \left\| \frac{1}{n} \sum_{i=1}^n w_i A_i \right\|_2 \\
& \leq \frac{1}{n} \sum_{i=1}^n \|\beta_{K2}(\mathbf{X}_i) \otimes \alpha_{K1}(\mathbf{T}_i) - \bar{\beta}_{K2} \otimes \bar{\alpha}_{K1}\|_2 O(K^{-\tilde{\alpha}}) + \left\| \frac{1}{n} \sum_{i=1}^n w_i A_i \right\|_2 \\
& \leq \frac{1}{n} \sum_{i=1}^n (\|\beta_{K2}(\mathbf{X}_i) \otimes \alpha_{K1}(\mathbf{T}_i)\|_2 + \|\bar{\beta}_{K2} \otimes \bar{\alpha}_{K1}\|_2) O(K^{-\tilde{\alpha}}) + \left\| \frac{1}{n} \sum_{i=1}^n w_i A_i \right\|_2 \\
& = \frac{1}{n} \sum_{i=1}^n (\|\beta_{K2}(\mathbf{X}_i)\|_2 \cdot \|\alpha_{K1}(\mathbf{T}_i)\|_2 + \|\bar{\beta}_{K2}\|_2 \cdot \|\bar{\alpha}_{K1}\|_2) O(K^{-\tilde{\alpha}}) + \left\| \frac{1}{n} \sum_{i=1}^n w_i A_i \right\|_2 \\
& \leq 2 \sup \|\alpha_{K1}(\mathbf{T}_i)\|_2 \sup \|\beta_{K2}(\mathbf{X}_i)\|_2 O(K^{-\tilde{\alpha}}) + \left\| \frac{1}{n} \sum_{i=1}^n w_i A_i \right\|_2 \\
& \leq O(K^{1/2-\tilde{\alpha}}) + \left\| \frac{1}{n} \sum_{i=1}^n w_i A_i \right\|_2.
\end{aligned} \tag{6}$$

The first inequality is due to triangle inequality and the second inequality is due to Assumption 4(iv) and  $\lambda_k \leq 1, k = 1, \dots, K$ . Next, we use the Bernstein's inequality to bound the second term.

Recall that the Bernstein's inequality for random matrix in Tropp et al. (2015): Let  $\{Z_i\}$  be a sequence of independent random matrices with dimension  $d_1 \times d_2$ . Assume that  $EZ_i = 0$  and  $\|Z_i\|_2 \leq R_n$  almost surely. Define

$$\sigma_n^2 = \max\left\{\left\|\sum_{i=1}^n E(Z_i Z_i^\top)\right\|_2, \left\|\sum_{i=1}^n E(Z_i^\top Z_i)\right\|_2\right\}, \tag{7}$$

then for all  $\epsilon \geq 0$ ,

$$P\left(\left\|\sum_{i=1}^n Z_i\right\|_2 \geq 0\right) \leq (d_1 + d_2) \exp\left(-\frac{\epsilon^2/2}{\sigma_n^2 + R_n \epsilon/3}\right). \tag{8}$$

For the second term  $\left\|\frac{1}{n} \sum_{i=1}^n w_i A_i\right\|_2$ , we notice that

$$\begin{aligned}
E(w_i A_i) &= E(w_i \beta_{K2}(\mathbf{X}_i) \otimes \alpha_{K1}(\mathbf{T}_i)) - E(w_i \bar{\beta}_{K2} \otimes \bar{\alpha}_{K1}) \\
&= E(\beta_{K2}(\mathbf{X}_i)) \otimes E(\alpha_{K1}(\mathbf{T}_i)) - E(\bar{\beta}_{K2}) \otimes E(\bar{\alpha}_{K1}) \\
&= 0.
\end{aligned} \tag{9}$$

Then for  $\| \frac{1}{n} \sum_{i=1}^n w_i A_i \|_2$ , we have

$$\| \frac{1}{n} w_i A_i \|_2 \leq \frac{1}{n} \| w_i \|_2 \| A_i \|_2 \leq \eta_1 \frac{K^{1/2}}{n} \quad (10)$$

Next, for  $\| \frac{1}{n} \sum_{i=1}^n E(w_i^2 A_i A_i^\top) \|_2$ , we have

$$\begin{aligned} & \| \frac{1}{n} \sum_{i=1}^n E(w_i^2 A_i A_i^\top) \|_2 \\ &= \| \frac{1}{n} \sum_{i=1}^n E(w_i^2 (\beta_{K2}(\mathbf{X}_i) \otimes \alpha_{K1}(\mathbf{T}_i) - \bar{\beta}_{K2} \otimes \bar{\alpha}_{K1}) (\beta_{K2}(\mathbf{X}_i) \otimes \alpha_{K1}(\mathbf{T}_i) - \bar{\beta}_{K2} \otimes \bar{\alpha}_{K1})^\top) \|_2 \\ &= \| \frac{1}{n} \sum_{i=1}^n E(w_i^2 \{ (\beta_{K2}(\mathbf{X}_i) \beta_{K2}(\mathbf{X}_i)^\top) \otimes (\alpha_{K1}(\mathbf{T}_i) \alpha_{K1}(\mathbf{T}_i)^\top) - (\beta_{K2}(\mathbf{X}_i) \bar{\beta}_{K2}^\top) \otimes (\alpha_{K1}(\mathbf{T}_i) \bar{\alpha}_{K1}^\top) \\ &\quad - (\bar{\beta}_{K2} \beta_{K2}(\mathbf{X}_i)^\top) \otimes (\bar{\alpha}_{K1} \alpha_{K1}(\mathbf{T}_i)^\top) + (\bar{\alpha}_{K1} \bar{\alpha}_{K1}^\top) \otimes (\bar{\alpha}_{K1} \bar{\alpha}_{K1}^\top) \}) \|_2 \\ &\leq \| \frac{\eta_2}{n} \sum_{i=1}^n E(w_i \{ (\beta_{K2}(\mathbf{X}_i) \beta_{K2}(\mathbf{X}_i)^\top) \otimes (\alpha_{K1}(\mathbf{T}_i) \alpha_{K1}(\mathbf{T}_i)^\top) - (\beta_{K2}(\mathbf{X}_i) \bar{\beta}_{K2}^\top) \otimes (\alpha_{K1}(\mathbf{T}_i) \bar{\alpha}_{K1}^\top) \\ &\quad - (\bar{\beta}_{K2} \beta_{K2}(\mathbf{X}_i)^\top) \otimes (\bar{\alpha}_{K1} \alpha_{K1}(\mathbf{T}_i)^\top) + (\bar{\alpha}_{K1} \bar{\alpha}_{K1}^\top) \otimes (\bar{\alpha}_{K1} \bar{\alpha}_{K1}^\top) \}) \|_2 \\ &= \| \frac{\eta_2}{n} \sum_{i=1}^n \{ E(\beta_{K2}(\mathbf{X}_i) \beta_{K2}(\mathbf{X}_i)^\top) \otimes E(\alpha_{K1}(\mathbf{T}_i) \alpha_{K1}(\mathbf{T}_i)^\top) - E(\beta_{K2}(\mathbf{X}_i) \bar{\beta}_{K2}^\top) \otimes E(\alpha_{K1}(\mathbf{T}_i) \bar{\alpha}_{K1}^\top) \\ &\quad - E(\bar{\beta}_{K2} \beta_{K2}(\mathbf{X}_i)^\top) \otimes E(\bar{\alpha}_{K1} \alpha_{K1}(\mathbf{T}_i)^\top) + E(\bar{\alpha}_{K1} \bar{\alpha}_{K1}^\top) \otimes E(\bar{\alpha}_{K1} \bar{\alpha}_{K1}^\top) \} \|_2 \\ &\leq \eta_2 \{ \| E(\beta_{K2}(\mathbf{X}_i) \beta_{K2}(\mathbf{X}_i)^\top) \|_2 \cdot \| E(\alpha_{K1}(\mathbf{T}_i) \alpha_{K1}(\mathbf{T}_i)^\top) \|_2 \\ &\quad + \| E(\beta_{K2}(\mathbf{X}_i) \bar{\beta}_{K2}^\top) \|_2 \cdot \| E(\alpha_{K1}(\mathbf{T}_i) \bar{\alpha}_{K1}^\top) \|_2 + \| E(\bar{\beta}_{K2} \beta_{K2}(\mathbf{X}_i)^\top) \|_2 \cdot \| E(\bar{\alpha}_{K1} \alpha_{K1}(\mathbf{T}_i)^\top) \|_2 \\ &\quad + \| E(\bar{\beta}_{K2} \bar{\beta}_{K2}^\top) \|_2 \cdot \| E(\bar{\alpha}_{K1} \bar{\alpha}_{K1}^\top) \|_2 \} \\ &\leq 4\eta_2 C_1 C_2 \\ &\leq C \end{aligned} \quad (11)$$

Finally, for  $\| \frac{1}{n} \sum_{i=1}^n E(w_i^2 A_i^\top A_i) \|_2$ , we have

$$\begin{aligned}
& \left\| \frac{1}{n} \sum_{i=1}^n E(w_i^2 A_i^\top A_i) \right\|_2 \\
&= \left\| \frac{1}{n} \sum_{i=1}^n E(w_i^2 (\beta_{K2}(\mathbf{X}_i) \otimes \alpha_{K1}(\mathbf{T}_i) - \bar{\beta}_{K2} \otimes \bar{\alpha}_{K1})^\top (\beta_{K2}(\mathbf{X}_i) \otimes \alpha_{K1}(\mathbf{T}_i) - \bar{\beta}_{K2} \otimes \bar{\alpha}_{K1})) \right\|_2 \\
&= \left\| \frac{1}{n} \sum_{i=1}^n E(w_i^2 \{ (\beta_{K2}(\mathbf{X}_i)^\top \beta_{K2}(\mathbf{X}_i)) \otimes (\alpha_{K1}(\mathbf{T}_i)^\top \alpha_{K1}(\mathbf{T}_i)) - (\beta_{K2}(\mathbf{X}_i)^\top \bar{\beta}_{K2}) \otimes (\alpha_{K1}(\mathbf{T}_i)^\top \bar{\alpha}_{K1}) \right. \\
&\quad \left. - (\bar{\beta}_{K2}^\top \beta_{K2}(\mathbf{X}_i)) \otimes (\bar{\alpha}_{K1}^\top \alpha_{K1}(\mathbf{T}_i)) + (\bar{\alpha}_{K1}^\top \bar{\alpha}_{K1}) \otimes (\bar{\alpha}_{K1}^\top \bar{\alpha}_{K1}) \} \right\|_2 \\
&\leq \left\| \frac{\eta_2}{n} \sum_{i=1}^n E(w_i \{ (\beta_{K2}(\mathbf{X}_i)^\top \beta_{K2}(\mathbf{X}_i)) \otimes (\alpha_{K1}(\mathbf{T}_i)^\top \alpha_{K1}(\mathbf{T}_i)) - (\beta_{K2}(\mathbf{X}_i)^\top \bar{\beta}_{K2}) \otimes (\alpha_{K1}(\mathbf{T}_i)^\top \bar{\alpha}_{K1}) \right. \\
&\quad \left. - (\bar{\beta}_{K2}^\top \beta_{K2}(\mathbf{X}_i)) \otimes (\bar{\alpha}_{K1}^\top \alpha_{K1}(\mathbf{T}_i)) + (\bar{\alpha}_{K1}^\top \bar{\alpha}_{K1}) \otimes (\bar{\alpha}_{K1}^\top \bar{\alpha}_{K1}) \} \right\|_2 \\
&= \left\| \frac{\eta_2}{n} \sum_{i=1}^n \{ E(\beta_{K2}(\mathbf{X}_i)^\top \beta_{K2}(\mathbf{X}_i)) \otimes E(\alpha_{K1}(\mathbf{T}_i)^\top \alpha_{K1}(\mathbf{T}_i)) - E(\beta_{K2}(\mathbf{X}_i)^\top \bar{\beta}_{K2}) \otimes E(\alpha_{K1}(\mathbf{T}_i)^\top \bar{\alpha}_{K1}) \right. \\
&\quad \left. - E(\bar{\beta}_{K2}^\top \beta_{K2}(\mathbf{X}_i)) \otimes E(\bar{\alpha}_{K1}^\top \alpha_{K1}(\mathbf{T}_i)) + E(\bar{\alpha}_{K1}^\top \bar{\alpha}_{K1}) \otimes E(\bar{\alpha}_{K1}^\top \bar{\alpha}_{K1}) \} \right\|_2 \\
&\leq \frac{\eta_2}{n} \sum_{i=1}^n \{ \| E(\beta_{K2}(\mathbf{X}_i)^\top \beta_{K2}(\mathbf{X}_i)) \|_2 \cdot \| E(\alpha_{K1}(\mathbf{T}_i)^\top \alpha_{K1}(\mathbf{T}_i)) \|_2 \\
&\quad + \| E(\beta_{K2}(\mathbf{X}_i)^\top \bar{\beta}_{K2}) \|_2 \cdot \| E(\alpha_{K1}(\mathbf{T}_i)^\top \bar{\alpha}_{K1}) \|_2 + \| E(\bar{\beta}_{K2}^\top \beta_{K2}(\mathbf{X}_i)) \|_2 \cdot \| E(\bar{\alpha}_{K1}^\top \alpha_{K1}(\mathbf{T}_i)) \|_2 \\
&\quad + \| E(\bar{\beta}_{K2}^\top \bar{\beta}_{K2}) \|_2 \cdot \| E(\bar{\alpha}_{K1}^\top \bar{\alpha}_{K1}) \|_2 \} \\
&\leq 4\eta_2 K^{1/2} \\
&\leq C_3 K^{1/2}
\end{aligned} \tag{12}$$

Therefore,

$$\sigma_n^2 = C_3 K^{1/2}. \tag{13}$$

Combing (35), (36) and (37) with the Bernstein's inequality, we have

$$P(\| \sum_{i=1}^n w_i A_i \|_2 \geq \epsilon) \leq (K+1) \exp\left(-\frac{\epsilon^2/2}{C_3 K^{1/2} + C_1 \frac{K^{1/2}}{n} \cdot \frac{\epsilon}{3}}\right). \tag{14}$$

The right side goes to zero as  $K \rightarrow \infty$  when  $\frac{\epsilon^2/2}{C_3 K^{1/2} + C_1 \frac{K^{1/2}}{n} \cdot \frac{\epsilon}{3}} > \log K$ . It suffices when  $\epsilon = O_p(K^{1/2} \log(K)/n)$ .

Moreover,

$$\Delta^\top \left\{ \sum_{i=1}^n (\rho''(A_i^\top \tilde{\theta}) A_i A_i^\top) \Delta \right\} \geq c_1 \eta_2^2 \Delta^\top \left\{ \sum_{i=1}^n (w_i^2 A_i A_i^\top) \Delta \right\} \tag{15}$$

According to ? and Assumption 4(v), the smallest eigenvalue of matrix  $\frac{1}{n} \sum_{i=1}^n (w_i A_i)(w_i A_i)^\top$  satisfies that  $\lambda_{\min} = O_p(n^{-1/2})$ . Then,

$$\begin{aligned} \Delta^\top \left\{ \sum_{i=1}^n (\rho''(A_i^\top \theta) A_i A_i^\top) \Delta \right\} &\geq \eta_1 n \Delta^\top \left\{ \frac{1}{n} \sum_{i=1}^n (A_i A_i^\top) \Delta \right\} \\ &\geq \lambda_{\min} \eta_1 n \|\Delta\|_2^2 \\ &= O_p(n^{1/2}) \|\Delta\|_2^2. \end{aligned} \quad (16)$$

Combine (5), (13) and (15), we can obtain that

$$\begin{aligned} G(\theta + \Delta) - G(\theta) &\geq O_p(n^{1/2}) \|\Delta\|_2^2 - (\sqrt{\delta} + O_p(K^{1/2} \log(K)/n + K^{1/2-\tilde{\alpha}})) \|\Delta\|_2 \\ &\geq 0 \end{aligned} \quad (17)$$

for  $\Delta = C(\frac{K^{1/2} \log(K)}{n^{3/2}} + K^{1/2-\alpha})$  with large enough constant  $C > 0$ . Hence, Lemma 1 is proved.

Next, we will prove Theorem 2. Specifically, by Mean Value Theorem, we can deduce that

$$\begin{aligned} &\int |\hat{w} - w|^2 dF(\mathbf{t}, \mathbf{x}) \\ &\leq \sup_{(\mathbf{t}, \mathbf{x})} |\exp\{\tilde{M}_K(\mathbf{t}, \mathbf{x})^\top \theta_1 - 1\}|^2 \times \int |\tilde{M}_K(\mathbf{t}, \mathbf{x})^\top (\hat{\theta} - \theta^*)|^2 dF(\mathbf{t}, \mathbf{x}) \\ &\leq O(1) \cdot \int |\tilde{M}_K(\mathbf{t}, \mathbf{x})^\top (\hat{\theta} - \theta^*)|^2 dF(\mathbf{t}, \mathbf{x}), \end{aligned}$$

where  $\theta_1$  lies between  $\hat{\theta}$  and  $\theta^*$ . Since

$$\begin{aligned} &\int |\tilde{M}_K(\mathbf{t}, \mathbf{x})^\top (\hat{\theta} - \theta^*)|^2 dF(\mathbf{t}, \mathbf{x}) \\ &= \int \tilde{M}_K(\mathbf{t}, \mathbf{x})^\top (\hat{\theta} - \theta^*) (\hat{\theta} - \theta^*)^\top \tilde{M}_K(\mathbf{t}, \mathbf{x}) dF(\mathbf{t}, \mathbf{x}) \\ &= \text{tr}\{(\hat{\theta} - \theta^*) (\hat{\theta} - \theta^*)^\top \int \tilde{M}_K(\mathbf{t}, \mathbf{x}) \tilde{M}_K(\mathbf{t}, \mathbf{x})^\top dF(\mathbf{t}, \mathbf{x})\} \\ &\leq C \text{tr}\{(\hat{\theta} - \theta^*) (\hat{\theta} - \theta^*)^\top\} \\ &= C \|\hat{\theta} - \theta^*\|^2 \\ &= O_p((\frac{K^{1/2} \log(K)}{n^{3/2}} + K^{1/2-\alpha})^2). \end{aligned}$$

Then we have

$$\int |\hat{w} - w|^2 dF(\mathbf{t}, \mathbf{x}) = O_p((\frac{K^{1/2} \log(K)}{n^{3/2}} + K^{1/2-\alpha})^2)$$



Furthermore, one can show that

$$\frac{1}{n} \sum_{i=1}^n | \tilde{M}_K(\mathbf{t}, \mathbf{x})^\top (\hat{\theta} - \theta^*) |^2 - \int | \tilde{M}_K(\mathbf{t}, \mathbf{x})^\top (\hat{\theta} - \theta^*) |^2 dF(\mathbf{t}, \mathbf{x}) = o_p(1).$$

Hence,

$$\begin{aligned} & \frac{1}{n} \sum_{i=1}^n | \hat{w}_i - w_i |^2 \\ & \leq \sup_{(\mathbf{t}, \mathbf{x})} | \exp\{\tilde{M}_K(\mathbf{t}, \mathbf{x})^\top \theta_1 - 1\} |^2 \cdot \frac{1}{n} \sum_{i=1}^n | \tilde{M}_K(\mathbf{t}, \mathbf{x})^\top (\hat{\theta} - \theta^*) |^2 \\ & \leq O(1) \int | \tilde{M}_K(\mathbf{t}, \mathbf{x})^\top (\hat{\theta} - \theta^*) |^2 dF(\mathbf{t}, \mathbf{x}) + o_p(1) \\ & = O_p\left(\left(\frac{K^{1/2} \log(K)}{n^{3/2}} + K^{1/2-\alpha}\right)^2\right). \end{aligned}$$

Therefore, the proof of Theorem 2 is completed.

## 4. Proof of Theorem 3

We first show the conclusion of Theorem 3(i).

Since  $\hat{\mathbf{B}}$  (as a estimator of  $\mathbf{B}^*$ ) is a unique minimizer of  $\frac{1}{n} \sum_{i=1}^n \hat{w}_i (Y_i - < \mathbf{B}, \mathbf{T}_i >)^2$  (regarding  $\mathbb{E}[w(Y - < \mathbf{B}, \mathbf{T} >)^2]$ ), according to the theory of M-estimation [3, Theorem 5.7], if

$$\sup_{\beta \in \Theta_1} \left| \frac{1}{n} \sum_{i=1}^n \hat{w}_i (Y_i - < \mathbf{B}, \mathbf{T}_i >)^2 - \mathbb{E}[w(Y - < \mathbf{B}, \mathbf{T} >)^2] \right| \rightarrow_p 0,$$

then  $\hat{\mathbf{B}} \rightarrow_p \mathbf{B}^*$ . Note that

$$\begin{aligned} & \sup_{\mathbf{B} \in \Theta_1} \left| \frac{1}{n} \sum_{i=1}^n \hat{w}_i (Y_i - < \mathbf{B}, \mathbf{T}_i >)^2 - \mathbb{E}[w(Y - < \mathbf{B}, \mathbf{T} >)^2] \right| \\ & \leq \sup_{\mathbf{B} \in \Theta_1} \left| \frac{1}{n} \sum_{i=1}^n (\hat{w}_i - w_i) (Y_i - < \mathbf{B}, \mathbf{T}_i >)^2 \right| \\ & + \sup_{\mathbf{B} \in \Theta_1} \left| \frac{1}{n} \sum_{i=1}^n w_i (Y_i - < \mathbf{B}, \mathbf{T}_i >)^2 - \mathbb{E}[w(Y - < \mathbf{B}, \mathbf{T} >)^2] \right|. \quad (18) \end{aligned}$$

We first show that  $\sup_{\mathbf{B} \in \Theta_1} \left| \frac{1}{n} \sum_{i=1}^n (\hat{w}_i - w_i)(Y_i - \langle \mathbf{B}, \mathbf{T}_i \rangle)^2 \right|$  is  $o_p(1)$ . Using the Cauchy-Schwarz inequality and the fact that  $\hat{w} \rightarrow^{L^2} w$ , we have

$$\begin{aligned} & \sup_{\mathbf{B} \in \Theta_1} \left| \frac{1}{n} \sum_{i=1}^n (\hat{w}_i - w_i)(Y_i - \langle \mathbf{B}, \mathbf{T}_i \rangle)^2 \right| \\ & \leq \left\{ \frac{1}{n} \sum_{i=1}^n (\hat{w}_i - w_i)^2 \right\}^{1/2} \sup_{\mathbf{B} \in \Theta_1} \left\{ \frac{1}{n} \sum_{i=1}^n (Y_i - \langle \mathbf{B}, \mathbf{T}_i \rangle)^2 \right\}^{1/2} \\ & \leq o_p(1) \{ \sup_{\mathbf{B} \in \Theta_1} \mathbb{E}[w(Y - \langle \mathbf{B}, \mathbf{T} \rangle)^2] + o_p(1) \}^{1/2} \\ & = o_p(1). \end{aligned}$$

Thereafter, under Assumption 5, we can conclude that  $\sup_{\mathbf{B} \in \Theta_1} \left| \frac{1}{n} \sum_{i=1}^n w_i(Y_i - \langle \mathbf{B}, \mathbf{T}_i \rangle)^2 - \mathbb{E}[w(Y - \langle \mathbf{B}, \mathbf{T} \rangle)^2] \right|$  is also  $o_p(1)$  [2, Lemma 2.4]. Hence, we complete the proof for Theorem 3(i). Next, we give the proof of Theorem 3(ii). Define

$$\hat{\mathbf{B}}^* = \operatorname{argmin}_{\mathbf{B}} \sum_{i=1}^n w_i(Y_i - \langle \mathbf{B}, \mathbf{T}_i \rangle)^2.$$

Assume that  $\frac{1}{n} \sum_{i=1}^n w_i(Y_i - \langle \hat{\mathbf{B}}^*, \mathbf{T}_i \rangle)h(\mathbf{T}_i; \hat{\mathbf{B}}^*) = o_p(n^{-1/2})$  holds with probability to one as  $n \rightarrow \infty$

By Assumption 5 and the uniform law of large number, one can get that

$$\frac{1}{n} \sum_{i=1}^n w_i(Y_i - \langle \mathbf{B}, \mathbf{T}_i \rangle)^2 \rightarrow \mathbb{E}\{w(Y - \langle \mathbf{B}, \mathbf{T} \rangle)^2\} \text{ in probability uniformly over } \mathbf{B},$$

which implies  $\|\hat{\mathbf{B}}^* - \mathbf{B}^*\| \rightarrow_p 0$ . Let

$$r(\mathbf{B}) = 2\mathbb{E}\{w(Y - \langle \mathbf{B}, \mathbf{T} \rangle)h(\mathbf{T}; \mathbf{B})\},$$

which is a differentiable function in  $\mathbf{B}$  and  $r(\mathbf{B}^*) = 0$ . By mean value theorem, we have

$$\sqrt{n}r(\hat{\mathbf{B}}^*) - \nabla_{\mathbf{B}}r(\zeta) \cdot \sqrt{n}(\hat{\mathbf{B}}^* - \mathbf{B}^*) = \sqrt{n}r(\mathbf{B}^*) = 0$$

where  $\zeta$  lies on the line joining  $\hat{\mathbf{B}}^*$  and  $\mathbf{B}^*$ . Since  $\nabla_{\mathbf{B}}r(\mathbf{B})$  is continuous at  $\mathbf{B}^*$  and  $\|\hat{\mathbf{B}}^* - \mathbf{B}^*\| \rightarrow_p 0$ , then

$$\sqrt{n}(\operatorname{vec} \hat{\mathbf{B}}^* - \operatorname{vec} \mathbf{B}^*) = \nabla_{\mathbf{B}}r(\mathbf{B}^*)^{-1} \cdot \sqrt{n}r(\hat{\mathbf{B}}^*) + o_p(1)$$

Define the empirical process

$$G_n(\mathbf{B}) = \frac{2}{\sqrt{n}} \sum_{i=1}^n \{w_i(Y_i - \langle \mathbf{B}, \mathbf{T}_i \rangle)h(\mathbf{T}_i; \mathbf{B}) - \mathbb{E}\{w(Y - \langle \mathbf{B}, \mathbf{T} \rangle)h(\mathbf{T}; \mathbf{B})\}\}.$$

Then we have

$$\begin{aligned}
& \sqrt{n}(\text{vec } \hat{\mathbf{B}}^* - \text{vec } \mathbf{B}^*) \\
&= \nabla_{\beta} r(\mathbf{B}^*)^{-1} \cdot \left\{ \sqrt{n} r(\hat{\mathbf{B}}^*) - \frac{2}{\sqrt{n}} \sum_{i=1}^n \{w_i(Y_i - < \hat{\mathbf{B}}^*, \mathbf{T}_i >) h(\mathbf{T}_i; \hat{\mathbf{B}}^*)\} \right. \\
&\quad \left. + \frac{2}{\sqrt{n}} \sum_{i=1}^n \{w_i(Y_i - < \hat{\mathbf{B}}^*, \mathbf{T}_i >) h(\mathbf{T}_i; \hat{\mathbf{B}}^*)\} \right\} \\
&= -\nabla_{\beta} r(\mathbf{B}^*)^{-1} \cdot G_n(\hat{\mathbf{B}}^*) + o_p(1) \\
&= U^{-1} \cdot \{G_n(\hat{\mathbf{B}}^*) - G_n(\mathbf{B}^*) + G_n(\mathbf{B}^*)\} + o_p(1).
\end{aligned}$$

By Assumption 5, 6, Theorem 4 and 5 of Andrews(1994), we have  $G_n(\hat{\mathbf{B}}^*) - G_n(\mathbf{B}^*) \rightarrow_p 0$ . Thus,

$$\sqrt{n}(\text{vec } \hat{\mathbf{B}}^* - \text{vec } \mathbf{B}^*) = U^{-1} \frac{2}{\sqrt{n}} \sum_{i=1}^n \{w_i(Y_i - < \mathbf{B}^*, \mathbf{T}_i >) h(\mathbf{T}_i; \mathbf{B}^*)\} + o_p(1),$$

then we can get that the asymptotic variance of  $\sqrt{n}(\text{vec } \hat{\mathbf{B}}^* - \text{vec } \mathbf{B}^*)$  is  $V$ . Therefore,  $\sqrt{n}(\text{vec } \hat{\mathbf{B}}^* - \text{vec } \mathbf{B}^*) \rightarrow_d N(0, V)$ . Next, we will prove  $\hat{\mathbf{B}} \rightarrow_p \hat{\mathbf{B}}^*$ . Since

$$\begin{aligned}
& \sup_{\mathbf{B} \in \Theta_1} \left| \frac{1}{n} \sum_{i=1}^n \hat{w}_i(Y_i - < \mathbf{B}, \mathbf{T}_i >)^2 - \frac{1}{n} \sum_{i=1}^n w_i(Y_i - < \mathbf{B}, \mathbf{T}_i >)^2 \right| \\
&\leq \sup_{\mathbf{B} \in \Theta_1} \left| \frac{1}{n} \sum_{i=1}^n (\hat{w}_i - w_i)(Y_i - < \mathbf{B}, \mathbf{T}_i >)^2 \right| \\
&\leq \left\{ \frac{1}{n} \sum_{i=1}^n (\hat{w}_i - w_i)^2 \right\}^{1/2} \sup_{\mathbf{B} \in \Theta_1} \left\{ \frac{1}{n} \sum_{i=1}^n (Y_i - < \mathbf{B}, \mathbf{T}_i >)^2 \right\}^{1/2} \\
&\leq o_p(1) \{ \sup_{\mathbf{B} \in \Theta_1} \mathbb{E}[w(Y - < \mathbf{B}, \mathbf{T} >)^2] + o_p(1) \}^{1/2} \\
&= o_p(1),
\end{aligned}$$

which implies  $\hat{\mathbf{B}}^* \rightarrow_p \hat{\mathbf{B}}$ . Then by Slutsky's Theorem, we can draw the conclusion that  $\sqrt{n}(\text{vec } \hat{\mathbf{B}} - \text{vec } \mathbf{B}^*) \rightarrow_d N(0, V)$ . Therefore, we have completed the proof of Theorem 3.

## 5. Proof of Theorem 4

For convenience, we use a mapping  $\Omega : R^{p \times q \times D} \times R \rightarrow R^{p \times q \times D}$  to represent the operator of absorbing the constant into the coefficients of B-spline basis for the

first predictor. More precisely,  $\Omega$  is defined by

$$\mathbf{G}^b = \Omega(\mathbf{G}, c),$$

where  $\mathbf{G}_{i_1, i_2, d} = \mathbf{G}_{i_1, i_2, d}$  for  $(i_1, i_2) \neq (1, 1)$  and  $\mathbf{G}_{1, 1, d} = \mathbf{G}_{1, 1, d} + pqc, d = 1, \dots, D$ . It then follows from the property of B-spline functions that

$$c + \frac{1}{pq} \langle \mathbf{G}, \Phi(\mathbf{T}) \rangle = \frac{1}{pq} \langle \mathbf{G}^b, \Phi(\mathbf{T}) \rangle.$$

We also write  $\mathbf{G}_0 = \sum_{r=1}^{R_0} \mathbf{B}_{0r} \circ_{0r}, r = 1, \dots, R_0$ . Suppose  $(\hat{\mathbf{G}}, \hat{c})$  is a solution to (19) and

$$\hat{\mathbf{G}} = \sum_{r=1}^R \hat{1}^{(r)} \circ \hat{2}^{(r)} \circ \hat{r},$$

then by [[? ], Lemma B.1], there exists  $\check{c} \in R$  and

$$\check{\mathbf{G}} = \sum_{r=1}^R \check{1}^{(r)} \circ \check{2}^{(r)} \circ \check{r},$$

such that

$$\check{c} + \frac{1}{pq} \langle \check{\mathbf{G}}, \Phi(\mathbf{T}) \rangle = \hat{c} + \frac{1}{pq} \langle \hat{\mathbf{G}}, \Phi(\mathbf{T}) \rangle, \quad (19)$$

where  $\check{r} = (\check{\alpha}_{r,1}, \dots, \check{\alpha}_{r,D})'$  satisfying

$$\sum_{d=1}^D \check{\alpha}_{r,d} u_d = 0$$

with  $u_d = \int_0^1 b_d(x) dx$ . Using (27), we have

$$\sum_{i=1}^n (\hat{w}_i y_i - \check{c} - \frac{1}{pq} \langle \check{\mathbf{G}}, \Phi(\mathbf{T}_i) \rangle)^2 \leq \sum_{i=1}^n (\hat{w}_i y_i - c_0 - \frac{1}{pq} \langle \mathbf{G}_0, \Phi(\mathbf{T}_i) \rangle)^2. \quad (20)$$

Let  $\check{\mathbf{G}}^b = \Omega(\check{\mathbf{G}}, \check{c})$  and  $\mathbf{G}_0^b = \Omega(\mathbf{G}_0, c_0)$ , then

$$\sum_{i=1}^n (\hat{w}_i y_i - \frac{1}{pq} \langle \check{\mathbf{G}}^b, \Phi(\mathbf{T}_i) \rangle)^2 \leq \sum_{i=1}^n (\hat{w}_i y_i - \frac{1}{pq} \langle \mathbf{G}_0^b, \Phi(\mathbf{T}_i) \rangle)^2. \quad (21)$$

Therefore, we have

$$\sum_{i=1}^n ((\hat{w}_i - w_i + w_i) y_i - \frac{1}{pq} \langle \check{\mathbf{G}}^b, \Phi(\mathbf{T}_i) \rangle)^2 \leq \sum_{i=1}^n ((\hat{w}_i - w_i + w_i) y_i - \frac{1}{pq} \langle \mathbf{G}_0^b, \Phi(\mathbf{T}_i) \rangle)^2, \quad (22)$$

which leads to

$$\begin{aligned} \sum_{i=1}^n (w_i y_i - \frac{1}{pq} \langle \check{\mathbf{G}}^b, \Phi(\mathbf{T}_i) \rangle)^2 &\leq \sum_{i=1}^n (w_i y_i - \frac{1}{pq} \langle \mathbf{G}_0^b, \Phi(\mathbf{T}_i) \rangle)^2 \\ &\quad + 2 \sum_{i=1}^n (\hat{w}_i - w_i) y_i (\frac{1}{pq} \langle \check{\mathbf{G}}^b - \mathbf{G}_0, \Phi(\mathbf{T}_i) \rangle). \end{aligned} \quad (23)$$

Let  $\mathbf{G}^\# = \check{\mathbf{G}}^b - \mathbf{G}_0^b$ ,  $\mathbf{a}^\# = \text{vec}(\mathbf{G}^\#)$ ,  $\mathbf{a}_0^b = \text{vec}(\mathbf{G}_0^b)$ ,  $\check{\mathbf{a}}^b = \text{vec}(\check{\mathbf{G}}^b)$  and  $\mathbf{Z} = (\mathbf{z}_1, \dots, \mathbf{z}_n)' \in R^{n \times pqD}$ , where  $\mathbf{z}_i = \text{vec}(\Phi(\mathbf{T}_i))$ ,  $i = 1, \dots, n$ . Let  $y_{\hat{w}} = (\hat{w}_1 y_1, \dots, \hat{w}_n y_n)'$  and  $y_w = (w_1 y_1, \dots, w_n y_n)'$ , then using (31) and working out the squares, we obtain

$$\begin{aligned} \frac{1}{p^2 q^2} \|\mathbf{Za}^\#\|^2 &\leq 2 \langle \frac{1}{pq} \mathbf{Z}\check{\mathbf{a}}^b, y_w \rangle - 2 \langle \frac{1}{pq} \mathbf{Za}_0^b, y_w \rangle \\ &\quad - 2 \frac{1}{p^2 q^2} \langle \mathbf{Za}^\#, \mathbf{Za}_0^b \rangle + 2 \langle \frac{1}{pq} \mathbf{Za}^\#, y_{\hat{w}} - y_w \rangle \\ &= 2 \langle \frac{1}{pq} \mathbf{Za}^\#, y_{\hat{w}} - y_w \rangle + 2 \langle \frac{1}{pq} \mathbf{Za}^\#, \rangle + 2 \langle \frac{1}{pq} \mathbf{Za}^\#, y_w - \rangle - \frac{1}{pq} \mathbf{Za}_0^b \rangle \end{aligned} \quad (24)$$

First, we show the upper bound of  $\langle \frac{1}{pq} \mathbf{Za}^\#, y_{\hat{w}} - y_w \rangle$ . Using the Cauchy-Schwarz inequality, we have

$$\begin{aligned} &\langle \frac{1}{pq} \mathbf{Za}^\#, y_{\hat{w}} - y_w \rangle \\ &\leq \|\hat{w} - w\|_2 \cdot \|\frac{1}{pq} \mathbf{Za}^\#\|_2 \\ &\leq \frac{C_1 \sqrt{nh_n}}{pq} \cdot \|\hat{w} - w\|_2 \cdot \|\mathbf{a}^\#\|_2 \end{aligned} \quad (25)$$

By the conclusion of Theorem 2(ii), we have

$$\|\hat{w} - w\|_2 = O_p\left(\frac{K^{1/2} \log(K)}{n^{3/2}} + K^{1/2-\alpha}\right) \quad (26)$$

Applying (37) to (36), we can obtain that

$$\langle \frac{1}{pq} \mathbf{Za}^\#, y_{\hat{w}} - y_w \rangle \leq O_p\left(\frac{K^{1/2} \log(K)}{n^{3/2}} + K^{1/2-\alpha}\right) \frac{\sqrt{nh_n}}{pq} \|\mathbf{a}^\#\|_2. \quad (27)$$

Second, by the conclusion of [4, (A.18) and (A.20)], we can obtain the upper bound of  $\langle \frac{1}{pq} \mathbf{Za}^\#, \rangle$  and  $\langle \frac{1}{pq} \mathbf{Za}^\#, y_w - \rangle - \frac{1}{pq} \mathbf{Za}_0^b \rangle$ , which are

$$\langle \frac{1}{pq} \mathbf{Za}^\#, \rangle \leq \frac{C_3}{pq} \|\mathbf{a}^\#\|_2 \{nh_n(R^3 + R(p+q) + RD)\}^{1/2}. \quad (28)$$

and

$$\left\langle \frac{1}{pq} \mathbf{Z} \mathbf{a}^\# , y_w - \frac{1}{pq} \mathbf{Z} \mathbf{a}_0^b \right\rangle \leq \frac{C_4}{pq} \|\mathbf{a}^\#\|_2 \left\{ \frac{\sum_{r=1}^{R_0} \|\text{vec}(\mathbf{B}_{0r})\|_1}{pq} \right\} \frac{n\sqrt{h_n}}{D^\tau} \quad (29)$$

Therefore, applying (38), (39) and (40) to (35), we have

$$\frac{C_5}{pq} \|\mathbf{a}^\#\|_2^2 \leq R_1 \|\mathbf{a}^\#\|_2, \quad (30)$$

where

$$\begin{aligned} R_1 = & C_6 \left( \frac{K^{1/2} \log(K)}{n^{3/2}} + K^{1/2-\alpha} \right) \sqrt{\frac{D}{n}} \\ & + C_7 \left\{ \frac{D(R^3 + R(p+q) + RD)}{n} \right\}^{1/2} \\ & + C_8 \left\{ \frac{\sum_{r=1}^{R_0} \|\text{vec}(\mathbf{B}_{0r})\|_1}{pq} \right\} \frac{1}{D^{\tau-1/2}}. \end{aligned}$$

By solving the second order inequality (41), we have

$$\frac{C_5}{pq} \|\mathbf{a}^\#\|_2 \leq R_1 \quad (31)$$

Further, by Assumption 6 and [4, (A.38) of Lemma A.2], we have

$$\begin{aligned} \|\hat{s}(\mathbf{T}) - s(\mathbf{T})\|^2 & \leq C_9 h_n \frac{1}{p^2 q^2} \|\mathbf{a}^\#\|^2 \\ & = \frac{C_{10} R_1^2}{D} \\ & = O_p \left( \left( \frac{K^{1/2} \log(K)}{n^{3/2}} + K^{1/2-\alpha} \right)^2 \right) + O_p \left( \frac{R^3 + R(p+q) + RD}{n} \right) \\ & \quad + O_p \left( \left\{ \frac{\sum_{r=1}^{R_0} \|\text{vec}(\mathbf{B}_{0r})\|_1}{pq} \right\}^2 \frac{1}{D^{2\tau}} \right). \end{aligned} \quad (32)$$

Hence, the proof of Theorem 4 is completed.

## Reference

- [1] Mohri, M., Rostamizadeh, A., and Talwalkar, A. (2018). *Foundations of machine learning*. MIT press.
- [2] Newey, W. K. and McFadden, D. (1994). Large sample estimation and hypothesis testing. *Handbook of econometrics*, 4:2111–2245.

- [3] Van der Vaart, A. W. (2000). *Asymptotic statistics*, volume 3. Cambridge university press.
- [4] Zhou, Y., Wong, R., and He, K. (2020). Broadcasted nonparametric tensor regression.
